# Supplementary material for: Transition Cow Nutrition and Management Strategies of Dairy Herds in the Northeastern United States: Associations of Nutritional Strategies with Analytes, Health, Milk Yield, and Reproduction
Source: MDPI journal article supplement (doi:10.3390/ani13172701), 2023-08-24
Supplement: s1 [file s1]

Table S1. The distribution of herds feeding a commercial anionic supplement during the close-up dry period, feeding monensin during the close-up and the fresh period, feeding rumen-protected choline during the close-up and fresh period, and routinely administering oral propylene glycol before or after parturition between nutrition strategies within each period for multiparous cows enrolled in a 72-farm prospective cohort study in the northeastern US.

| Supplement and Period           | Nutrition Strategy | n (%)         | P-value |
|---------------------------------|--------------------|---------------|---------|
| Anionic fed during close-up     |                    |               |         |
| Far-off <sup>1</sup>            | CE                 | 33/43 (76.7%) | 1.0     |
|                                 | NCE                | 23/29 (79.3%) |         |
| Close-up <sup>2</sup>           | HF                 | 18/25 (72.0%) | 0.39    |
|                                 | LF                 | 38/47 (80.9%) |         |
| Fresh <sup>3</sup>              | LS                 | 27/32 (84.4%) | 0.27    |
|                                 | HS                 | 29/40 (72.5%) |         |
| Monensin fed during close-up    |                    |               |         |
| Far-off                         | CE                 | 39/43 (90.7%) | 0.64    |
|                                 | NCE                | 28/29 (96.6%) |         |
| Close-up                        | HF                 | 22/25 (88.0%) | 0.33    |
|                                 | LF                 | 45/47 (95.7%) |         |
| Fresh                           | LS                 | 29/32 (90.6%) | 0.65    |
|                                 | HS                 | 28/40 (95.0%) |         |
| Monensin fed during fresh       |                    |               |         |
| Far-off                         | CE                 | 40/43 (93.0%) | 0.68    |
|                                 | NCE                | 26/29 (89.7%) |         |
| Close-up                        | HF                 | 22/25 (88.0%) | 0.41    |
|                                 | LF                 | 44/47 (93.6%) |         |
| Fresh                           | LS                 | 30/32 (93.8%) | 0.69    |
|                                 | HS                 | 36/40 (90.0%) |         |
| RP choline fed during close-up  |                    |               |         |
| Far-off                         | CE                 | 13/43 (30.2%) | 0.18    |
|                                 | NCE                | 7/29 (24.1%)  |         |
| Close-up                        | HF                 | 7/25 (28.0%)  | 1.0     |
|                                 | LF                 | 13/47 (27.7%) |         |
| Fresh                           | LS                 | 10/32 (31.3%) | 0.60    |
|                                 | HS                 | 10/40 (25.0%) |         |
| RP choline fed during fresh     |                    |               |         |
| Far-off                         | CE                 | 8/43 (18.6%)  | 1.0     |
|                                 | NCE                | 5/29 (17.2%)  |         |
| Close-up                        | HF                 | 4/25 (16.0%)  | 1.0     |
|                                 | LF                 | 9/47 (19.2%)  |         |
| Fresh                           | LS                 | 8/32 (25.0%)  | 0.22    |
|                                 | HS                 | 5/40 (12.5%)  |         |
| Propylene glycol at parturition |                    |               |         |
| Far-off                         | CE                 | 3/43 (7.0%)   | 0.64    |
|                                 | NCE                | 1/29 (3.5%)   |         |

|          |    |             |      |
|----------|----|-------------|------|
| Close-up | HF | 1/25 (4.0%) | 1.0  |
|          | LF | 3/47 (6.4%) |      |
| Fresh    | LS | 0/32 (0%)   | 0.12 |
|          | HS | 4/40 (10%)  |      |

<sup>1</sup> Far-off-period diet characterized as a controlled-energy (CE; <16.5% starch, ≥40% forage neutral detergent fiber (NDF)) or not-CE diet (NCE; ≥16.5% starch, <40% forage NDF or both). <sup>2</sup> Close-up period diet characterized as a high-forage NDF (HF; ≥40% forage NDF) or low-forage NDF diet (LF; <40% forage NDF). <sup>3</sup> Fresh-period diet characterized as a low-starch (LS; <25.5% starch) or high-starch diet (HS; ≥25.5% starch).
